# Supplementary material
Source: PubMed Central journal article supplement (PMC2815871)

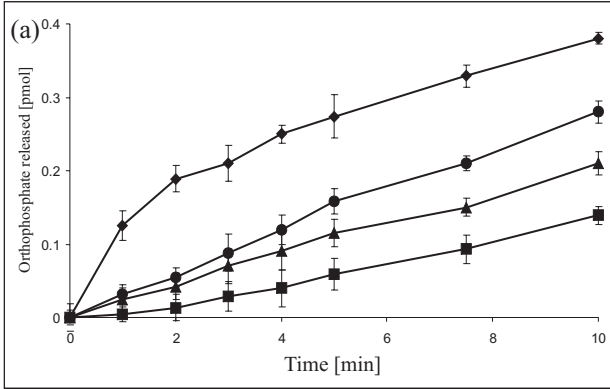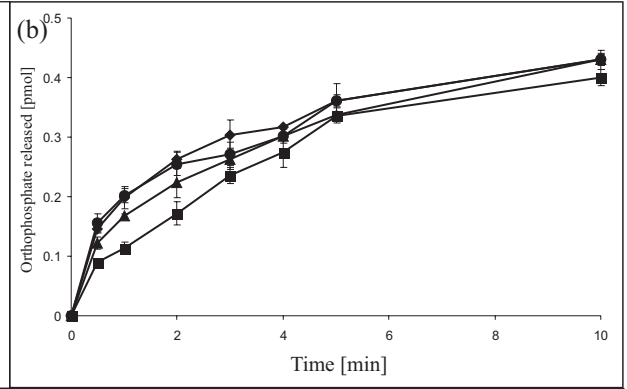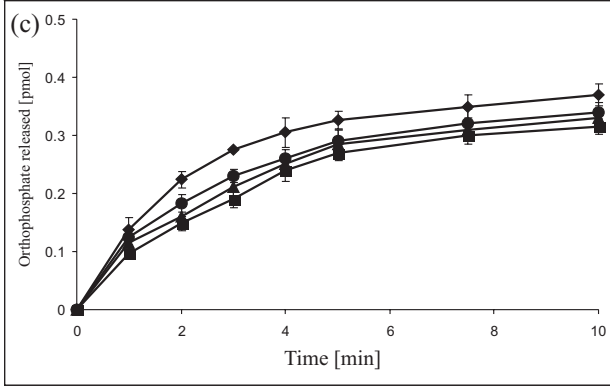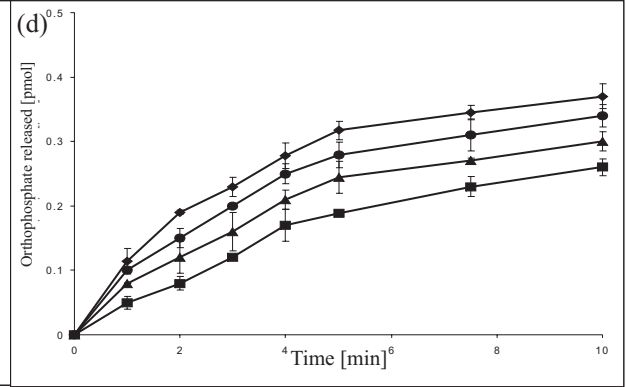

Supplement: pp.109.149914_1.pdf [file pp.109.149914_1.pdf]
